# Supplementary material for: Deadlocks of adenine ribonucleotide synthesis: evaluation of adsorption and condensation reactions in a zeolite micropore space
Source: Royal Society of Chemistry journal article supplement (doi:10.1039/d2qi00837h), 2022-01-01
Supplement: d2qi00837h1.pdf [file d2qi00837h1.pdf]

## Supplementary Informations – SI

Deadlocks of adenine ribonucleotides synthesis: Evaluation of adsorption and condensation reactions into a zeolite micropore space

Francisco Rodrigues,<sup>a,b,\*</sup> Thomas Georgelin,<sup>c</sup> Baptiste Rigaud,<sup>d</sup> Guanzheng Zhuang,<sup>a</sup> Maria Gardennia Fonseca,<sup>e</sup> Valentin Valtchev<sup>f</sup>, and Maguy Jaber<sup>a,\*</sup>

---

<sup>a.</sup> Sorbonne University, CNRS UMR 8220, Laboratoire d'Archéologie Moléculaire et Structurale, 4 place Jussieu, F-75005 Paris, France.

<sup>b.</sup> State University of Paraíba, UEPB, Department of Chemistry, Campina Grande, Paraíba, Brazil.

<sup>c.</sup> Centre de Biophysique Moléculaire, CNRS, Rue Charles Sadron, 45000 Orléans, France.

<sup>d.</sup> CNRS Institut des Matériaux de Paris Centre (FR2482), 4 place jussieu, 75005 Paris, France.

<sup>e.</sup> Federal University of Paraíba, UFPB, Department of Chemistry, João Pessoa, Paraíba, Brazil.

<sup>f.</sup> Normandy University, Laboratoire Catalyse & Spectrochimie, ENSICAEN, 6 bl Maréchal Juin, 14050 Caen, France.

\*Corresponding authors : [francisco.rodriques@servidor.uepb.edu.br](mailto:francisco.rodriques@servidor.uepb.edu.br); [maquy.jaber@upmc.fr](mailto:maquy.jaber@upmc.fr)

**Tab. SI-1.** Phosphate distribution signals from Q<sup>0</sup>, Q<sup>1</sup> and Q<sup>2</sup> species of <sup>31</sup>P NMR spectra of mordenite samples with inorganic monophosphates (Pi) and/or D-ribose (R) dried at 50 °C in air and/or activated at 150 °C under argon atmosphere. The relative percentage (%) of each contribution was calculated from the peak area of the deconvoluted signal.

| Sample             | Q <sup>0</sup> / δ (ppm) |                        | Q <sup>1</sup> / δ (ppm) |                        |                         |                         | Q <sup>2</sup> / δ (ppm) |                         |                         |                        |                        |
|--------------------|--------------------------|------------------------|--------------------------|------------------------|-------------------------|-------------------------|--------------------------|-------------------------|-------------------------|------------------------|------------------------|
| <b>Pi/MOR-50</b>   | <b>+0.3</b><br>(5.2%)    | <b>-3.2</b><br>(4.1%)  | <b>-6.3</b><br>(10.6%)   | <b>-8.8</b><br>(12.7%) | <b>-11.4</b><br>(16.0%) | <b>-13.8</b><br>(16.8%) | <b>-16.1</b><br>(13.6%)  | <b>-18.4</b><br>(12.8%) | <b>-21.5</b><br>(8.2%)  |                        |                        |
| <b>Pi/MOR-150</b>  | <b>-0.3</b><br>(4.1%)    | <b>-5.7</b><br>(7.4%)  | <b>-7.7</b><br>(7.5%)    | <b>-10.8</b><br>(9.9%) |                         | <b>-13.9</b><br>(15.2%) | <b>-17.2</b><br>(16.2%)  | <b>-20.8</b><br>(19.8%) | <b>-25.3</b><br>(18.0%) | <b>-31.9</b><br>(1.0%) | <b>-38.1</b><br>(1.0%) |
| <b>RPi/MOR-50</b>  | <b>+0.7</b><br>(55.6%)   | <b>-6.1</b><br>(18.8%) | <b>-6.3</b><br>(17.9%)   | <b>-9.6</b><br>(7.6%)  |                         |                         |                          |                         |                         |                        |                        |
| <b>RPi/MOR-150</b> | <b>+2.9</b><br>(2.5%)    | <b>+0.3</b><br>(7.9%)  | <b>-4.7</b><br>(6.7%)    | <b>-7.6</b><br>(17.2%) | <b>-10.2</b><br>(13.1%) | <b>-13.3</b><br>(19.1%) | <b>-17.8</b><br>(12.9%)  | <b>-21.9</b><br>(17.7%) | <b>-27.9</b><br>(2.8%)  |                        |                        |

Fig. SI-1  $^{13}\text{C}$  CP-MAS NMR spectrum of bulk D-ribose

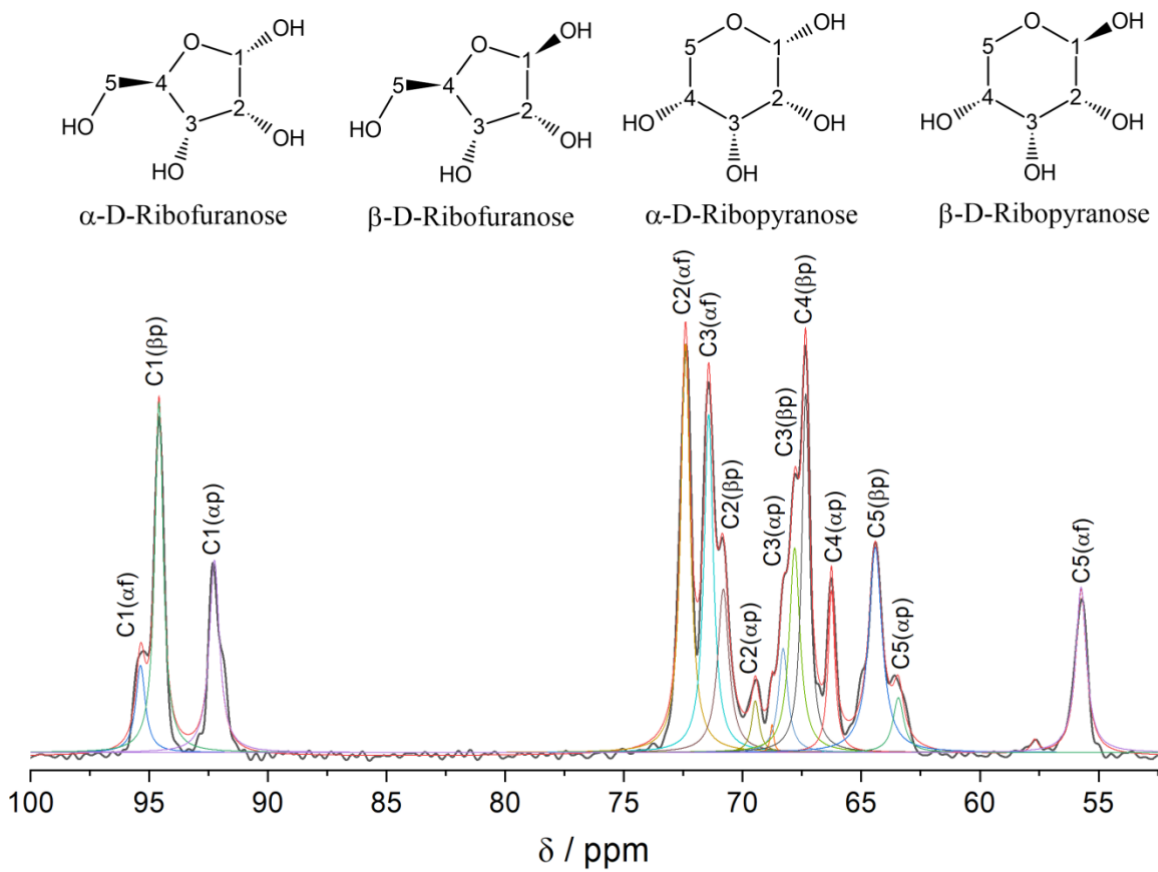

\*f and p stand for furanose and piranose, respectively.
